# Supplementary material for: Ligand noninnocence in FeNO corroles: insights from β-octabromocorrole complexes
Source: Royal Society of Chemistry journal article supplement (doi:10.1039/c5dt03947a), 2015-11-30
Supplement: c5dt03947a1.pdf [file c5dt03947a1.pdf]

## Supporting Information

### Ligand Noninnocence in FeNO Corroles: Insights from $\beta$ -Octabromocorrole Complexes

Hans-Kristian Norheim,<sup>a</sup> Jan Capar,<sup>a</sup> Rune F. Einrem,<sup>a</sup> Kevin J. Gagnon,<sup>b</sup> Christine M. Beavers,<sup>b</sup> Hugo Vazquez-Lima,<sup>\*</sup> and Abhik Ghosh<sup>\*</sup>

#### Optimized B3LYP/TZ2P coordinates

| Ir [Br <sub>8</sub> TPFPC] (NMe <sub>3</sub> ) <sub>2</sub> |           |           |           |
|-------------------------------------------------------------|-----------|-----------|-----------|
| Ir                                                          | 0.000000  | 0.000000  | 0.371041  |
| Br                                                          | 0.000000  | 1.803893  | 5.931520  |
| Br                                                          | 0.000000  | 3.126075  | -4.758459 |
| Br                                                          | 0.000000  | 4.728286  | 4.048207  |
| Br                                                          | 0.000000  | 5.393266  | -2.259063 |
| Br                                                          | 0.000000  | -1.803893 | 5.931520  |
| Br                                                          | 0.000000  | -3.126075 | -4.758459 |
| Br                                                          | 0.000000  | -4.728286 | 4.048207  |
| Br                                                          | 0.000000  | -5.393266 | -2.259063 |
| F                                                           | 0.000000  | 0.000000  | -8.577467 |
| F                                                           | 0.000000  | 8.932149  | 1.246416  |
| F                                                           | 0.000000  | -8.932149 | 1.246416  |
| F                                                           | 2.357237  | 0.000000  | -4.513608 |
| F                                                           | 2.357639  | 4.889388  | 0.832561  |
| F                                                           | 2.357639  | -4.889388 | 0.832561  |
| F                                                           | 2.357701  | 7.584611  | 1.114994  |
| F                                                           | 2.357701  | -7.584611 | 1.114994  |
| F                                                           | 2.358102  | 0.000000  | -7.223091 |
| F                                                           | -2.357237 | 0.000000  | -4.513608 |
| F                                                           | -2.357639 | 4.889388  | 0.832561  |
| F                                                           | -2.357639 | -4.889388 | 0.832561  |
| F                                                           | -2.357701 | 7.584611  | 1.114994  |
| F                                                           | -2.357701 | -7.584611 | 1.114994  |
| F                                                           | -2.358102 | 0.000000  | -7.223091 |
| N                                                           | 0.000000  | 1.256851  | 1.897363  |
| N                                                           | 0.000000  | 1.479065  | -0.985788 |
| N                                                           | 0.000000  | -1.256851 | 1.897363  |
| N                                                           | 0.000000  | -1.479065 | -0.985788 |
| N                                                           | 2.229427  | 0.000000  | 0.354815  |
| N                                                           | -2.229427 | 0.000000  | 0.354815  |
| C                                                           | 0.000000  | 0.000000  | -2.961577 |
| C                                                           | 0.000000  | 0.000000  | -4.450192 |
| C                                                           | 0.000000  | 0.000000  | -7.244274 |
| C                                                           | 0.000000  | 0.719030  | 3.155055  |
| C                                                           | 0.000000  | 1.277482  | -2.340467 |
| C                                                           | 0.000000  | 1.837014  | 4.048891  |
| C                                                           | 0.000000  | 2.608303  | -2.935766 |

|   |           |           |           |
|---|-----------|-----------|-----------|
| C | 0.000000  | 2.614979  | 1.887662  |
| C | 0.000000  | 2.821616  | -0.648841 |
| C | 0.000000  | 2.996451  | 3.285683  |
| C | 0.000000  | 3.346824  | 0.671055  |
| C | 0.000000  | 3.529977  | -1.921214 |
| C | 0.000000  | 4.827395  | 0.820654  |
| C | 0.000000  | 7.605775  | 1.114806  |
| C | 0.000000  | -0.719030 | 3.155055  |
| C | 0.000000  | -1.277482 | -2.340467 |
| C | 0.000000  | -1.837014 | 4.048891  |
| C | 0.000000  | -2.608303 | -2.935766 |
| C | 0.000000  | -2.614979 | 1.887662  |
| C | 0.000000  | -2.821616 | -0.648841 |
| C | 0.000000  | -2.996451 | 3.285683  |
| C | 0.000000  | -3.346824 | 0.671055  |
| C | 0.000000  | -3.529977 | -1.921214 |
| C | 0.000000  | -4.827395 | 0.820654  |
| C | 0.000000  | -7.605775 | 1.114806  |
| C | 1.186216  | 0.000000  | -5.168578 |
| C | 1.186781  | 5.540537  | 0.903971  |
| C | 1.186781  | -5.540537 | 0.903971  |
| C | 1.203156  | 6.916668  | 1.046907  |
| C | 1.203156  | -6.916668 | 1.046907  |
| C | 1.203182  | 0.000000  | -6.551777 |
| C | 2.764484  | 0.000000  | -1.035567 |
| C | 2.781858  | 1.203440  | 1.037169  |
| C | 2.781858  | -1.203440 | 1.037169  |
| C | -1.186216 | 0.000000  | -5.168578 |
| C | -1.186781 | 5.540537  | 0.903971  |
| C | -1.186781 | -5.540537 | 0.903971  |
| C | -1.203156 | 6.916668  | 1.046907  |
| C | -1.203156 | -6.916668 | 1.046907  |
| C | -1.203182 | 0.000000  | -6.551777 |
| C | -2.764484 | 0.000000  | -1.035567 |
| C | -2.781858 | 1.203440  | 1.037169  |
| C | -2.781858 | -1.203440 | 1.037169  |
| H | 2.412217  | 2.101921  | 0.555171  |
| H | 2.412217  | -2.101921 | 0.555171  |
| H | 2.427297  | 0.884403  | -1.561650 |
| H | 2.427297  | -0.884403 | -1.561650 |
| H | 2.487145  | 1.205396  | 2.080556  |
| H | 2.487145  | -1.205396 | 2.080556  |
| H | 3.855750  | 0.000000  | -1.001778 |
| H | 3.871857  | 1.184684  | 0.973002  |
| H | 3.871857  | -1.184684 | 0.973002  |
| H | -2.412217 | 2.101921  | 0.555171  |
| H | -2.412217 | -2.101921 | 0.555171  |
| H | -2.427297 | 0.884403  | -1.561650 |
| H | -2.427297 | -0.884403 | -1.561650 |
| H | -2.487145 | 1.205396  | 2.080556  |
| H | -2.487145 | -1.205396 | 2.080556  |
| H | -3.855750 | 0.000000  | -1.001778 |

|   |           |           |          |
|---|-----------|-----------|----------|
| H | -3.871857 | 1.184684  | 0.973002 |
| H | -3.871857 | -1.184684 | 0.973002 |

Fe[Br<sub>8</sub>TPFPC] (NO)

|    |           |           |           |
|----|-----------|-----------|-----------|
| Br | -5.615886 | -0.236620 | -1.760926 |
| Br | -3.780430 | -0.028639 | -4.685414 |
| Br | 2.480812  | -0.034028 | -5.353710 |
| Br | 4.948801  | -0.268372 | -3.093012 |
| Br | 4.948801  | -0.268372 | 3.093012  |
| Br | 2.480812  | -0.034028 | 5.353710  |
| Br | -3.780430 | -0.028639 | 4.685414  |
| Br | -5.615886 | -0.236620 | 1.760926  |
| Fe | -0.120284 | 0.380955  | 0.000000  |
| F  | -0.626629 | -2.256624 | -4.987166 |
| F  | -0.922018 | -2.135999 | -7.678448 |
| F  | -1.028025 | 0.280369  | -8.920049 |
| F  | -0.857209 | 2.574519  | -7.471374 |
| F  | -0.562961 | 2.450784  | -4.778888 |
| F  | 4.787953  | 2.131894  | 0.000000  |
| F  | 7.497504  | 2.033646  | 0.000000  |
| F  | 8.762532  | -0.372854 | 0.000000  |
| F  | 7.323218  | -2.678459 | 0.000000  |
| F  | 4.613711  | -2.576854 | 0.000000  |
| F  | -0.562961 | 2.450784  | 4.778888  |
| F  | -0.857209 | 2.574519  | 7.471374  |
| F  | -1.028025 | 0.280369  | 8.920049  |
| F  | -0.922018 | -2.135999 | 7.678448  |
| F  | -0.626629 | -2.256624 | 4.987166  |
| O  | 0.293967  | 3.189892  | 0.000000  |
| N  | -1.560414 | -0.029045 | -1.220912 |
| N  | 1.152526  | -0.049163 | -1.433920 |
| N  | 1.152526  | -0.049163 | 1.433920  |
| N  | -1.560414 | -0.029045 | 1.220912  |
| N  | 0.004927  | 2.069644  | 0.000000  |
| C  | -3.000612 | -0.044373 | -2.967826 |
| C  | -1.602785 | 0.000934  | -2.593590 |
| C  | -0.434189 | 0.031364  | -3.345357 |
| C  | 0.872620  | -0.011778 | -2.783044 |
| C  | 2.128786  | -0.062975 | -3.495113 |
| C  | 3.134472  | -0.145741 | -2.568968 |
| C  | 2.521024  | -0.125592 | -1.258144 |
| C  | 3.154185  | -0.157726 | 0.000000  |
| C  | 2.521024  | -0.125592 | 1.258144  |
| C  | 3.134472  | -0.145741 | 2.568968  |
| C  | 2.128786  | -0.062975 | 3.495113  |
| C  | 0.872620  | -0.011778 | 2.783044  |
| C  | -0.434189 | 0.031364  | 3.345357  |
| C  | -1.602785 | 0.000934  | 2.593590  |
| C  | -3.000612 | -0.044373 | 2.967826  |
| C  | -3.741633 | -0.113488 | 1.807270  |
| C  | -2.814944 | -0.094320 | 0.713581  |
| C  | -2.814944 | -0.094320 | -0.713581 |

|   |           |           |           |
|---|-----------|-----------|-----------|
| C | -3.741633 | -0.113488 | -1.807270 |
| C | -0.581334 | 0.093723  | -4.824999 |
| C | -0.682347 | -1.062420 | -5.586745 |
| C | -0.832402 | -1.014045 | -6.961680 |
| C | -0.887736 | 0.220301  | -7.597031 |
| C | -0.800122 | 1.391857  | -6.856039 |
| C | -0.650810 | 1.314612  | -5.481309 |
| C | 4.643360  | -0.220391 | 0.000000  |
| C | 5.401044  | 0.942039  | 0.000000  |
| C | 6.784707  | 0.905641  | 0.000000  |
| C | 7.431642  | -0.323475 | 0.000000  |
| C | 6.694957  | -1.501169 | 0.000000  |
| C | 5.312148  | -1.436071 | 0.000000  |
| C | -0.581334 | 0.093723  | 4.824999  |
| C | -0.650810 | 1.314612  | 5.481309  |
| C | -0.800122 | 1.391857  | 6.856039  |
| C | -0.887736 | 0.220301  | 7.597031  |
| C | -0.832402 | -1.014045 | 6.961680  |
| C | -0.682347 | -1.062420 | 5.586745  |
